# Supplementary material for: Multimodal X-ray microanalysis of a UFeO4: evidence for the environmental stability of ternary U(v) oxides from depleted uranium munitions testing
Source: Royal Society of Chemistry journal article supplement (doi:10.1039/d0em00243g), 2020-01-01
Supplement: d0em00243g1.pdf [file d0em00243g1.pdf]

1 **Supplementary Information for: Multimodal X-ray microanalysis of a  $\text{UFeO}_4$ :**  
2 **evidence for the environmental stability of ternary U(V) oxides from depleted**  
3 **uranium munitions testing**

4 Daniel E. Crean<sup>1</sup>, Martin C. Stennett<sup>1</sup>, Francis R. Livens<sup>2</sup>, Daniel Grolimund<sup>3</sup>, Camelia N. Borca<sup>3</sup> and Neil C. Hyatt<sup>1\*</sup>

5 1 – Immobilisation Science Laboratory, Department of Materials Science and Engineering, The University of Sheffield, UK

6 2 – Centre for Radiochemistry Research, Department of Chemistry, The University of Manchester, UK

7 3 – Swiss Light Source, Paul Scherrer Institute, Villigen, Switzerland

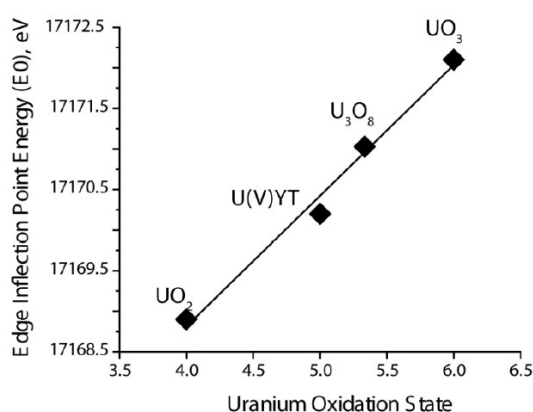

8

9 **Figure S1:** Calibration relationship used for determination of oxidation state. UYT is  $\text{U}_{0.5}\text{Y}_{0.5}\text{Ti}_2\text{O}_6$

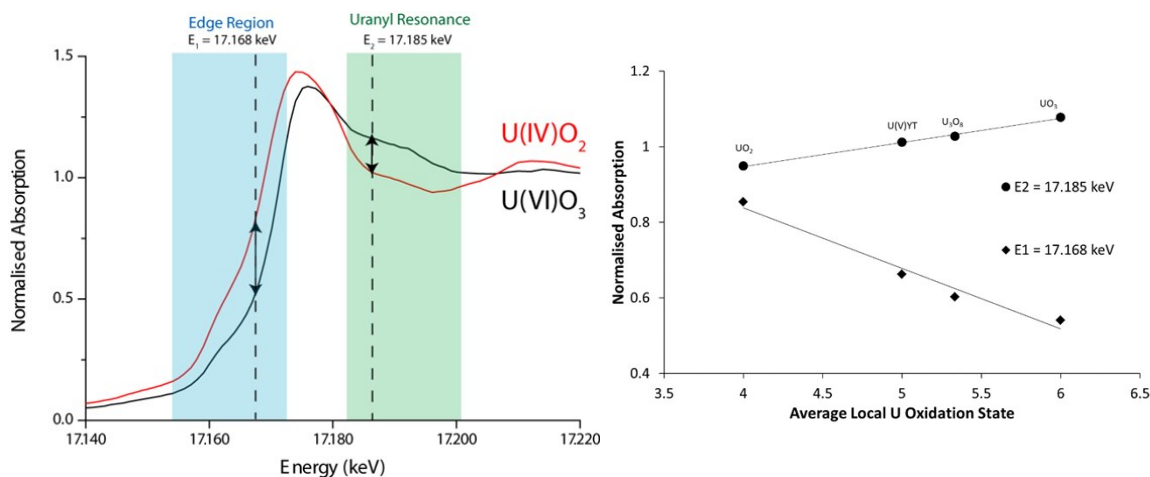

10

11 **Figure S2:** XANES data showing selection of excitation energies for chemical speciation imaging  
12 and calibration relationships used for determination of oxidation state. UYT is  $\text{U}_{0.5}\text{Y}_{0.5}\text{Ti}_2\text{O}_6$

13

14

\* Corresponding author: n.c.hyatt@sheffield.ac.uk

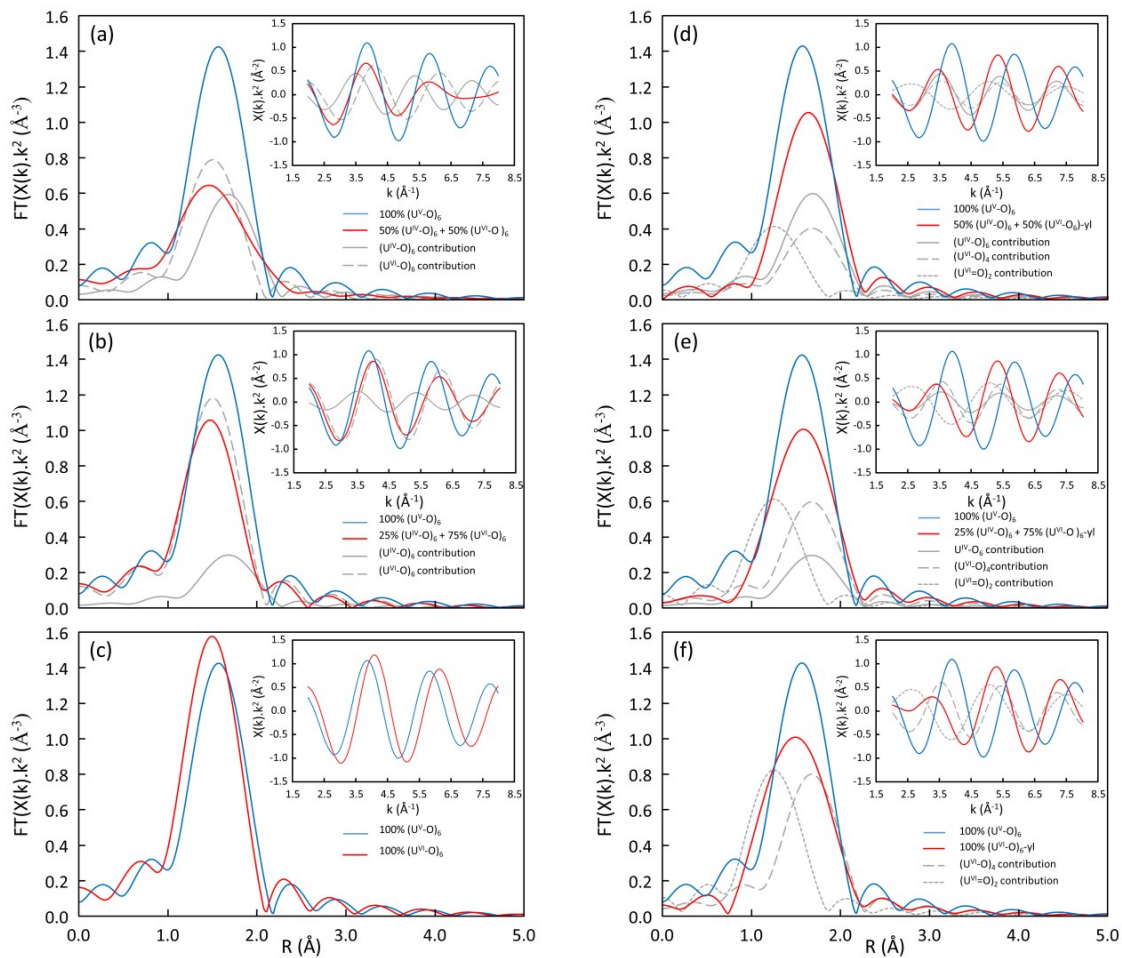

15

16 **Figure S3:** Comparison of computed  $k^2\chi(k)$  and  $|\text{FT } k^2\chi(k)|$  for plausible bounding contributions of  
 17 U(IV) and U(VI) environments to average a U(V) environment in  $\text{UFeO}_4$ , assuming charge  
 18 compensation by Fe(III) and/or Fe(II). Both uranyl and non-uranyl U(VI) environments are  
 19 considered. See text for details of calculations.

20
